# Supplementary material
Source: Springer Nature journal article supplement (https://www.springermedizin.de/resource/supplementary/12955_2006_249_MOESM3_ESM.pdf/9559986)

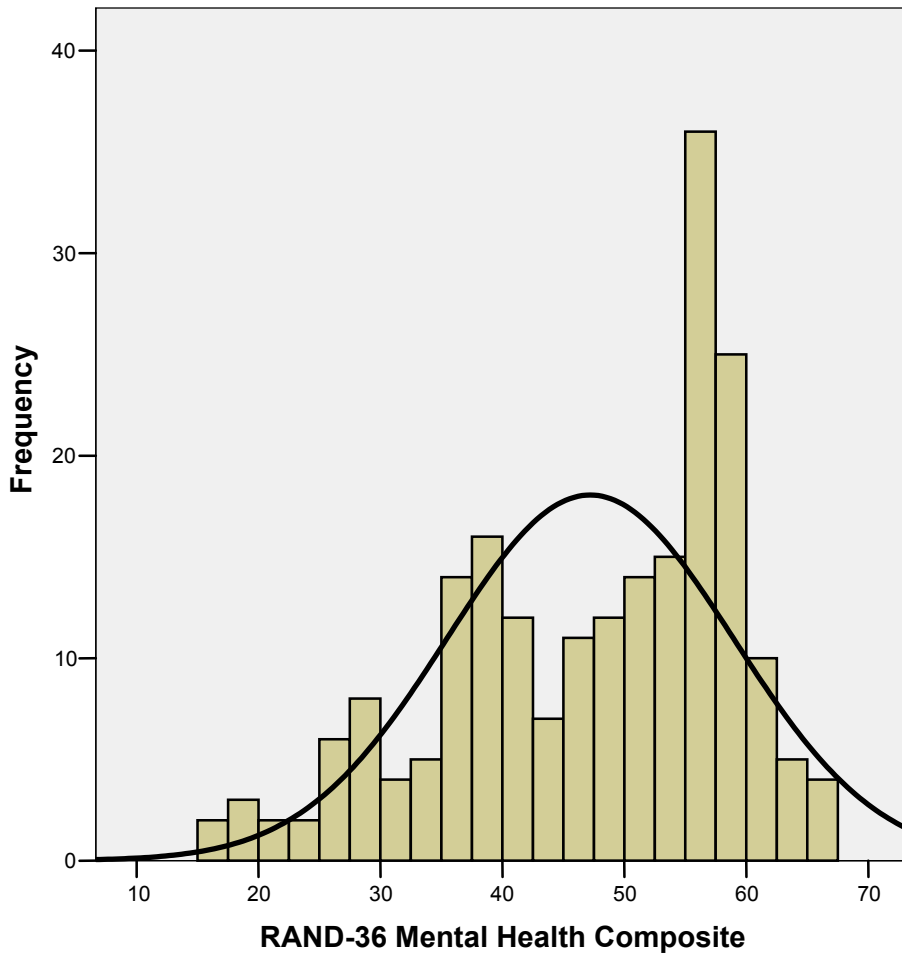

Mean = 47.20  
Std. Dev. = 11.77  
N = 213

Supplement: MOESM3 [file 9559986]
